# Supplementary material for: Antrodia cinnamomea Enhances Chemo-Sensitivity of 5-FU and Suppresses Colon Tumorigenesis and Cancer Stemness via Up-Regulation of Tumor Suppressor miR-142-3p
Source: PubMed Central journal article supplement (PMC6723279; doi:10.3390/biom9080306), 2019-07-25
Supplement: biomolecules-09-00306-s001.pdf [file biomolecules-09-00306-s001.pdf]

**Table S1: Primer sequences of microRNA**

| <b>miRNA</b>   | <b>QIAGEN catalog number</b> |
|----------------|------------------------------|
| hsa-miR-33     | MS00003304                   |
| hsa-miR-22-3p  | MS00003220                   |
| hsa-miR-34a-3p | MS00009534                   |
| hsa-miR-39-3p  | MS00008666                   |
| hsa-miR-98     | MS00003367                   |
| hsa-miR-142-3p | MS00031451                   |
| hsa-miR-143    | MS00008687                   |
| hsa-miR-145-3p | MS00008708                   |
| hsa-miR-338    | MS00003990                   |
